# Supplementary material for: Contribution of the IdyllaTM System to Improving the Therapeutic Care of Patients with NSCLC through Early Screening of EGFR Mutations
Source: MDPI journal article supplement (doi:10.3390/curroncol28060376), 2021-11-03
Supplement: s1 [file s1]

*Supplementary Materials*

# Contribution of the Idylla™ System to Improving the Therapeutic Care of Patients with NSCLC through Early Screening of *EGFR* Mutationss

Constance Petiteau <sup>1,†</sup>, Gwladys Robinet-Zimmermann <sup>2,†</sup>, Adèle Riot <sup>3,†</sup>, Marine Dorbeau <sup>2</sup>, Nicolas Richard <sup>4,5</sup>, Cécile Blanc-Fournier <sup>2</sup>, Frédéric Bibeau <sup>3</sup>, Simon Deshayes <sup>1</sup>, Emmanuel Bergot <sup>1,6</sup>, Radj Gervais <sup>7</sup> and Guénaëlle Levallet <sup>3,5,6,\*</sup>

<sup>1</sup> Department of Pulmonology & Thoracic Oncology, Centre Hospitalier Universitaire de Caen, F-14000 Caen, France; petiteau.co@gmail.com (C.P.); deshayses-si@chu-caen.fr (S.D.); bergot-e@chu-caen.fr (E.B.)

<sup>2</sup> Department of Pathology, Centre François Baclesse, F-14000 Caen, France; gwladys.robinet.zimmermann@chu-rennes.fr (G.R.-Z.); m.dorbeau@baclesse.unicancer.fr (M.D.); c.blanc.fournier@baclesse.unicancer.fr (C.B.-F.)

<sup>3</sup> Department of Pathology, Centre Hospitalier Universitaire de Caen, F-14000 Caen, France; ad-ele.riot@gmail.com (A.R.); fredbibo14@gmail.com (F.B.)

<sup>4</sup> Department of Genetics, Normandy University, UNICAEN, Caen University Hospital, EA 7450 BioTARGen, F-14000 Caen, France; richard-n@chu-caen.fr

<sup>5</sup> Federative Structure of Cyto-Molecular Oncogenetics (SF-MOCAE), Centre Hospitalier Universitaire de Caen, F-14000 Caen, France

<sup>6</sup> Normandy University, UNICAEN, CEA, CNRS, ISTCT Unit, GIP CYCERON, F-14000 Caen, France

<sup>7</sup> Department of Thoracic Oncology, Centre François Baclesse, F-14000 Caen, France; r.gervais@baclesse.unicancer.fr

\* Correspondence: guenaelle.levallet@unicaen.fr

† Equal contribution.

**Table S1.** Mutations detected with Idylla™ EGFR Mutation cartridge.

| Exon | Mutation                                 | Frequency  |
|------|------------------------------------------|------------|
|      | c.2156G>C, p.G719A                       | 0.6%       |
|      | G719C mutation:                          | 0.3%       |
| 18   | • c.2155G>T, p.G719C                     |            |
|      | • c.2154_2155delinsTT, p.G719C           |            |
|      | c.2155G>A, p.G719S                       | 0.5%       |
|      | Exon 19 deletion:                        |            |
|      | • c.2238_2248delinsGC, Del9              |            |
|      | • c.2239_2248delinsC, Del9               |            |
|      | • c.2240_2248del, Del9                   |            |
|      | • c.2239_2247del, Del9                   |            |
|      | • c.2239_2251delinsC, Del12              |            |
|      | • c.2240_2251del, Del12                  |            |
|      | • c.2235_2249del, Del15                  |            |
|      | • c.2236_2250del, Del15                  |            |
|      | • c.2239_2253del, Del15                  |            |
|      | • c.2240_2254del, Del15                  |            |
|      | • c.2238_2252del, Del15                  |            |
|      | • c.2237_2251del, Del15                  |            |
|      | • c.2235_2252delinsAAT, Del15            |            |
|      | • c.2237_2252delinsT, Del15              |            |
|      | • c.2234_2248del, Del15                  |            |
|      | • c.2236_2253delinsCTA, Del15            |            |
|      | • c.2237_2253delinsTA, Del15             |            |
| 19   | • c.2235_2251delinsAG, Del15             | 48 %       |
|      | • c.2236_2253delinsCAA, Del15            |            |
|      | • c.2230_2249delinsGTCAA, Del15          |            |
|      | • c.2240_2257del, Del18                  |            |
|      | • c.2237_2255delins, Del18               |            |
|      | • c.2239_2256del, Del18                  |            |
|      | • c.2236_2253del, Del18                  |            |
|      | • c.2239_2258delinsCA, Del18             |            |
|      | • c.2237_2254del, Del18                  |            |
|      | • c.2238_2255del, Del18                  |            |
|      | • c.2237_2257delinsTCT, Del18            |            |
|      | • c.2236_2255delinsAT, Del18             |            |
|      | • c.2236_2256delinsATC, Del18            |            |
|      | • c.2237_2256delinsTT, Del18             |            |
|      | • c.2237_2256delinsTC, Del18             |            |
|      | • c.2235_2255delinsGGT, Del18            |            |
|      | • c.2238_2258del, Del21                  |            |
|      | • c.2236_2256del, Del21                  |            |
|      | • c.2253_2276del, Del24                  |            |
|      | c.2369C>T, p.T790M                       |            |
|      | c.2303G>T, p.S768I                       |            |
|      | Exon 20 insertion:                       |            |
| 20   | • c.2310_2311insGGT, InsG                | <5%        |
|      | • c.2307_2308insGCCAGCGTG, InsASV9       | 1.5 to 3%  |
|      | • c.2309_2310delinsCCAGCGTGGAT, InsASV11 | 4 to 9.2 % |
|      | • c.2311_2312insGCGTGGACA, InsSVD        |            |
|      | • c.2319_2320insCAC, InsH                |            |
|      | L858R mutation:                          | 43 %       |
|      | • c.2573T>G, p.L858R                     |            |
| 21   | • c.2573_2574delinsGT, p.L858R           |            |
|      | • c.2573_2574delinsGA, p.L858R           |            |
|      | c.2582T>A, p.L861Q                       | 2 %        |
